# Supplementary material for: Advance care planning for adolescent patients with life-threatening neurological conditions: a survey of Japanese paediatric neurologists
Source: PubMed Central journal article supplement — BMJ Paediatr Open. 2017 Sep 28;1(1):e000102. doi: 10.1136/bmjpo-2017-000102 (PMC5862176; doi:10.1136/bmjpo-2017-000102), 2017-09-28
Supplement: bmjpo-2017-000102supp001.pdf [file bmjpo-2017-000102supp001.pdf]

**I Respondant profile.**

1)Age ( )y.o.

2)Sex 1. Male 2. Female

3)Place of Work

1. University Hospital 2. Children's Hospital 3. Rehabilitation centre  
4. Other Hospital 5. Clinic  
6. Other ( )

4)Postgraduate experience ( )yr

5)Specaility

1. Pediatric Neurology 2. Pediatric Hemmatology/Oncology 3. Internist  
4. Other ( )

6)Number of dying patients cared for

1. 0 2. 1~4 3. 5~9 4. 10~19  
5. 20~29 6. 30+

7)Number of dying patients <18 years of age cared for

1. 0 2. 1~4 3. 5~9 4. 10~19  
5. 20~29 6. 30+

© The following questions refer to your experience with caring for life-threatening adolescent patients (13-18y.o.) with decision making capacity.

1) Do you have experience to care for life-threatening adolescent patients (13-18y.o.) with decision making capacity?

1. Yes

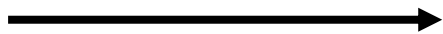

Go to Question II

2. No

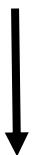

2) Do you have experience to care for life-threatening adolescent patients (13-18y.o.) without decision making capacity?

1. Yes

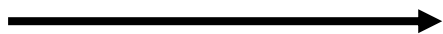

Go to Question III

2. No

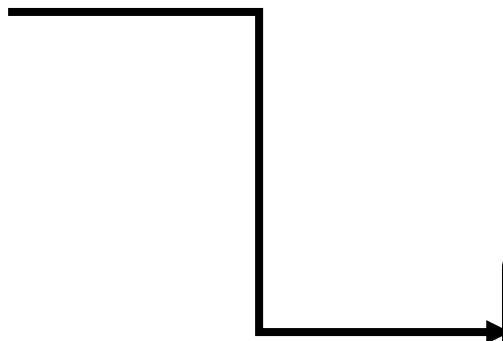

Go to Question IV

**II** The following questions refer to your experience with advance care discussions with life-threatening adolescent patients (13-18y.o.) with decision making capacity.

In your experience, how often do you address with patients about the following topics if the patient's prognosis is over 1 year?

|                                                                               | never | rarely | sometimes | often | always |
|-------------------------------------------------------------------------------|-------|--------|-----------|-------|--------|
| 1 . Discuss medical condition                                                 | 1     | 2      | 3         | 4     | 5      |
| 2 . Verify understanding of medical condition                                 | 1     | 2      | 3         | 4     | 5      |
| 3 . Discuss prognosis                                                         | 1     | 2      | 3         | 4     | 5      |
| 4 . Discuss goals of treatment and care                                       | 1     | 2      | 3         | 4     | 5      |
| 5 . Promote sharing of treatment and care goals between patients and families | 1     | 2      | 3         | 4     | 5      |
| 6 . Discuss where treatment and care will take place                          | 1     | 2      | 3         | 4     | 5      |
| 7 . Discuss DNAR                                                              | 1     | 2      | 3         | 4     | 5      |
| 8 . Discuss ventilator treatment if the patient's condition worsens           | 1     | 2      | 3         | 4     | 5      |

In your experience, how often do you address with patients about the following topics if the patient's prognosis is estimated less than 3month?

|                                                                               | never | rarely | sometimes | often | always |
|-------------------------------------------------------------------------------|-------|--------|-----------|-------|--------|
| 9 . Discuss medical condition                                                 | 1     | 2      | 3         | 4     | 5      |
| 10. Verify understanding of medical condition                                 | 1     | 2      | 3         | 4     | 5      |
| 11. Discuss prognosis                                                         | 1     | 2      | 3         | 4     | 5      |
| 12. Discuss goals of treatment and care                                       | 1     | 2      | 3         | 4     | 5      |
| 13. Promote sharing of treatment and care goals between patients and families | 1     | 2      | 3         | 4     | 5      |
| 14. Discuss where treatment and care will take place                          | 1     | 2      | 3         | 4     | 5      |
| 15. Discuss DNAR                                                              | 1     | 2      | 3         | 4     | 5      |
| 16. Discuss ventilator treatment if the patient's condition worsens           | 1     | 2      | 3         | 4     | 5      |

The following questions refer to your experience with advance directives with life-threatening adolescent patients (13-18y.o.) with decision making capacity.

Do you address with patients about the following topics?

|                                   | No | Yes |
|-----------------------------------|----|-----|
| 17. Cardiopulmonary resuscitation | 1  | 2   |
| 18. Use of ventilator             | 1  | 2   |
| 19. Use of vasopressor            | 1  | 2   |
| 20. Use of antibiotics            | 1  | 2   |
| 21. Use of tube-feeding           | 1  | 2   |
| 22. Use of intravenous fluids     | 1  | 2   |

**III** The following questions refer to your experience with advance care discussions with family of life-threatening adolescent patients (13-18y.o.) with decision making capacity.

In your experience, how often do you address with patients' families about the following topics if the patient's prognosis is over 1 year?

|                                                                               | never | rarely | sometimes | often | always |
|-------------------------------------------------------------------------------|-------|--------|-----------|-------|--------|
| 1 . Discuss medical condition                                                 | 1     | 2      | 3         | 4     | 5      |
| 2 . Verify understanding of medical condition                                 | 1     | 2      | 3         | 4     | 5      |
| 3 . Discuss prognosis                                                         | 1     | 2      | 3         | 4     | 5      |
| 4 . Discuss goals of treatment and care                                       | 1     | 2      | 3         | 4     | 5      |
| 5 . Promote sharing of treatment and care goals between patients and families | 1     | 2      | 3         | 4     | 5      |
| 6 . Discuss where treatment and care will take place                          | 1     | 2      | 3         | 4     | 5      |
| 7 . Discuss DNAR                                                              | 1     | 2      | 3         | 4     | 5      |
| 8 . Discuss ventilator treatment if the patient's condition worsens           | 1     | 2      | 3         | 4     | 5      |

In your experience, how often do you address with patients' families about the following topics if the patient's prognosis is estimated less than 3month?

|                                                                               | never | rarely | sometimes | often | always |
|-------------------------------------------------------------------------------|-------|--------|-----------|-------|--------|
| 1 . Discuss medical condition                                                 | 1     | 2      | 3         | 4     | 5      |
| 2 . Verify understanding of medical condition                                 | 1     | 2      | 3         | 4     | 5      |
| 3 . Discuss prognosis                                                         | 1     | 2      | 3         | 4     | 5      |
| 4 . Discuss goals of treatment and care                                       | 1     | 2      | 3         | 4     | 5      |
| 5 . Promote sharing of treatment and care goals between patients and families | 1     | 2      | 3         | 4     | 5      |
| 6 . Discuss where treatment and care will take place                          | 1     | 2      | 3         | 4     | 5      |
| 7 . Discuss DNAR                                                              | 1     | 2      | 3         | 4     | 5      |
| 8 . Discuss ventilator treatment if the patient's condition worsens           | 1     | 2      | 3         | 4     | 5      |

The following questions refer to your experience with advance directives with patients' families of life-threatening adolescent patients (13-18y.o.) with decision making capacity.

Do you address with patients' families about the following topics?

|                                   | No | Yes |
|-----------------------------------|----|-----|
| 17. Cardiopulmonary resuscitation | 1  | 2   |
| 18. Use of ventilator             | 1  | 2   |
| 19. Use of vasopressor            | 1  | 2   |
| 20. Use of antibiotics            | 1  | 2   |
| 21. Use of tube-feeding           | 1  | 2   |
| 22. Use of intravenous fluids     | 1  | 2   |

**IV** In your experience, how often have the following issues served as barriers to discuss about advance care planning with adolescent patients (13-18y.o.) with decision making capacity ?

**What is Advance Care Planning (ACP) ?**

Advance care planning (ACP) is a voluntary process of discussion about future care among patients, their families, and health care providers

|                                                                                      | Never | Rarely | Sometimes | Often | Always |
|--------------------------------------------------------------------------------------|-------|--------|-----------|-------|--------|
| 1. Physician does not know the right time to address the issue                       | 1     | 2      | 3         | 4     | 5      |
| 2. Physician does not know the things to say                                         | 1     | 2      | 3         | 4     | 5      |
| 3. Lack of physician time                                                            | 1     | 2      | 3         | 4     | 5      |
| 4. Insufficient laws and guidelines                                                  | 1     | 2      | 3         | 4     | 5      |
| 5. Ethical considerations                                                            | 1     | 2      | 3         | 4     | 5      |
| 6. Lack of training                                                                  | 1     | 2      | 3         | 4     | 5      |
| 7. Physician uncertain about the prognosis                                           | 1     | 2      | 3         | 4     | 5      |
| 8. Physician considers ACP not that important                                        | 1     | 2      | 3         | 4     | 5      |
| 9. Differences in understanding the prognosis between physician and patient          | 1     | 2      | 3         | 4     | 5      |
| 10. Differences in understanding the prognosis between physician and family          | 1     | 2      | 3         | 4     | 5      |
| 11. Differences in understanding the prognosis between patient and family            | 1     | 2      | 3         | 4     | 5      |
| 12. Unrealistic physician expectations                                               | 1     | 2      | 3         | 4     | 5      |
| 13. Unrealistic patient expectations                                                 | 1     | 2      | 3         | 4     | 5      |
| 14. Unrealistic family expectations                                                  | 1     | 2      | 3         | 4     | 5      |
| 15. Physician not ready to have the discussion                                       | 1     | 2      | 3         | 4     | 5      |
| 16. Patient not ready to have the discussion                                         | 1     | 2      | 3         | 4     | 5      |
| 17. Family not ready to have the discussion                                          | 1     | 2      | 3         | 4     | 5      |
| 18. Patient unable to fully comprehend the issue                                     | 1     | 2      | 3         | 4     | 5      |
| 19. Family unable to fully comprehend the issue                                      | 1     | 2      | 3         | 4     | 5      |
| 20. Conflict between patient and parents                                             | 1     | 2      | 3         | 4     | 5      |
| 21. Conflict between parents and other family members                                | 1     | 2      | 3         | 4     | 5      |
| 22. Physician concerned about losing the trust of the patient                        | 1     | 2      | 3         | 4     | 5      |
| 23. Physician concerned about losing the trust of the family                         | 1     | 2      | 3         | 4     | 5      |
| 24. No relationship between physician and patient                                    | 1     | 2      | 3         | 4     | 5      |
| 25. No relationship between physician and family                                     | 1     | 2      | 3         | 4     | 5      |
| 26. Physician concerned that the patient will receive less attention from physicians | 1     | 2      | 3         | 4     | 5      |
| 27. Physician concerned that the family will receive less attention from physicians  | 1     | 2      | 3         | 4     | 5      |
| 28. Physician concerned about taking away patient's hope                             | 1     | 2      | 3         | 4     | 5      |
| 29. Physician concerned about taking away family's hope                              | 1     | 2      | 3         | 4     | 5      |
